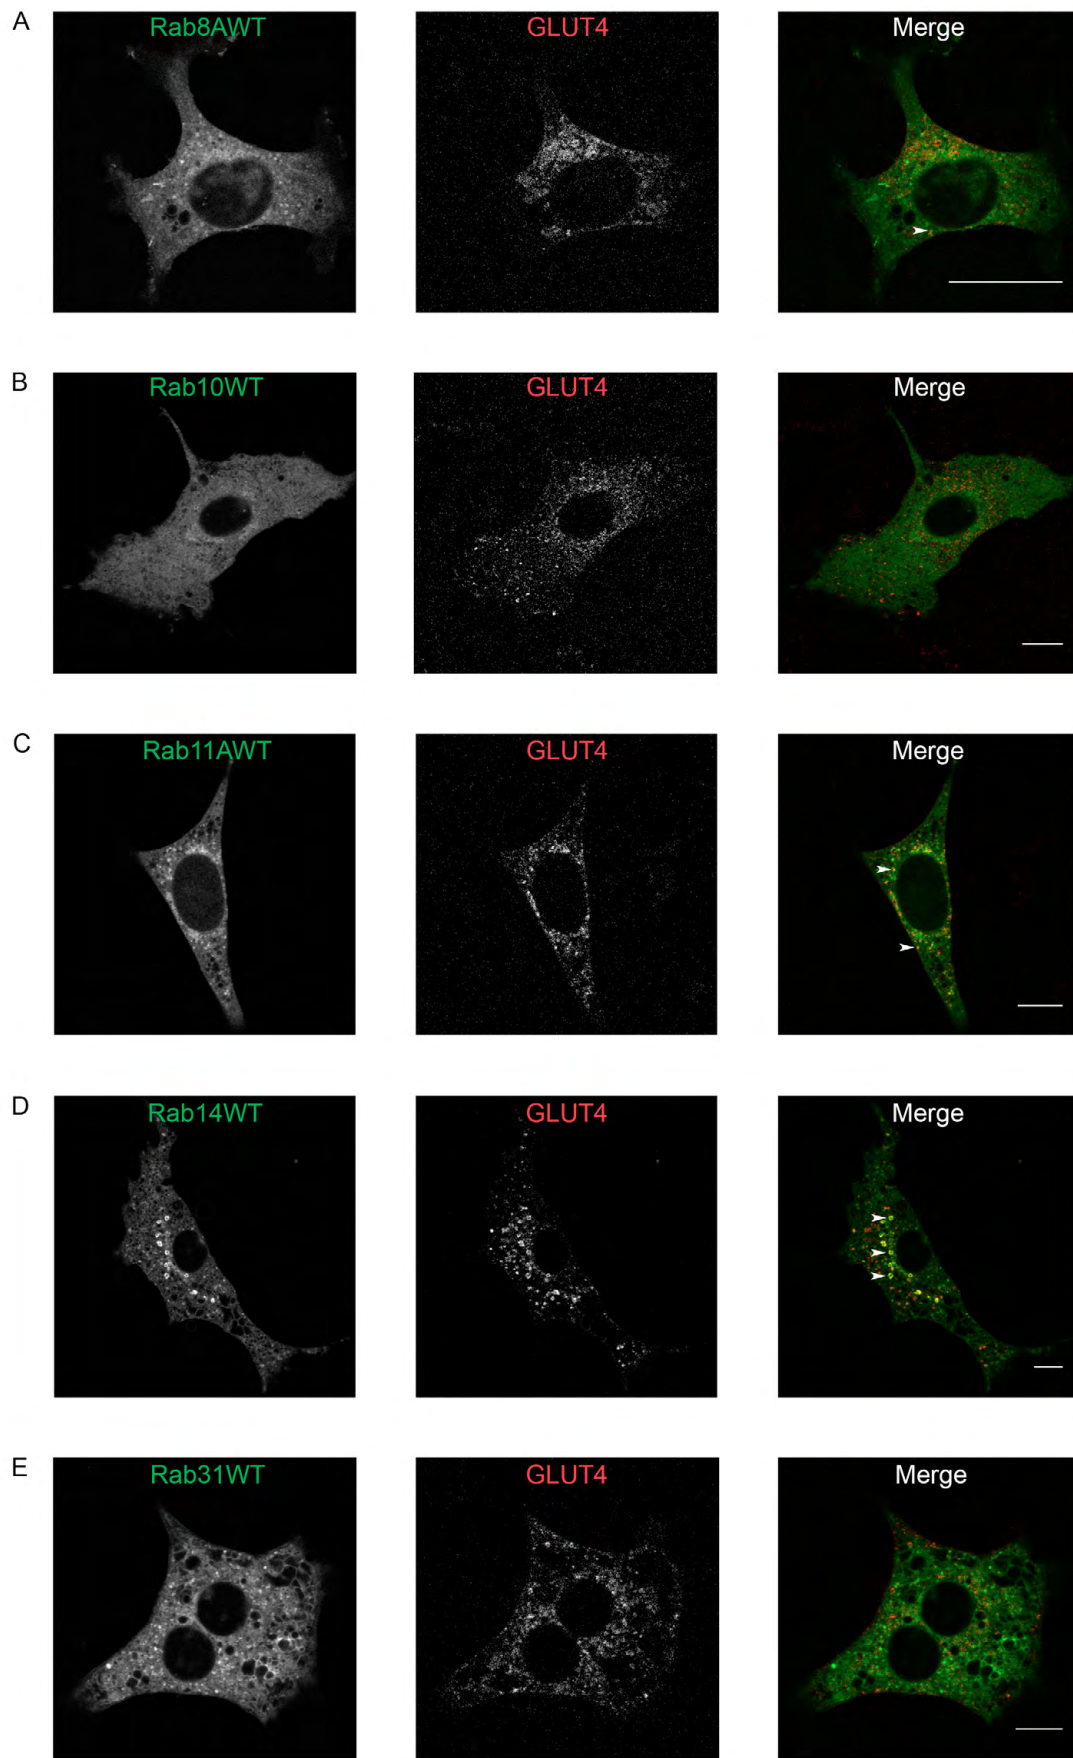

**Fig. S1. Only Rab14 displays extensive colocalisation with GLUT4.** 3T3-L1 adipocytes were electroporated with plasmids encoding HA-GLUT4-mCherry and either GFP-Rab8AWT (A), GFP-Rab10WT (B), GFP-Rab11AWT (C), GFP-Rab14WT (D) or GFP-Rab31WT (E). 24 hours later, cells were serum starved for 3 hours, fixed and imaged by confocal microscopy. White arrowheads indicate punctate/enlarged vesicular structures positive for Rab and GLUT4. Scale bars = 10  $\mu$ m.

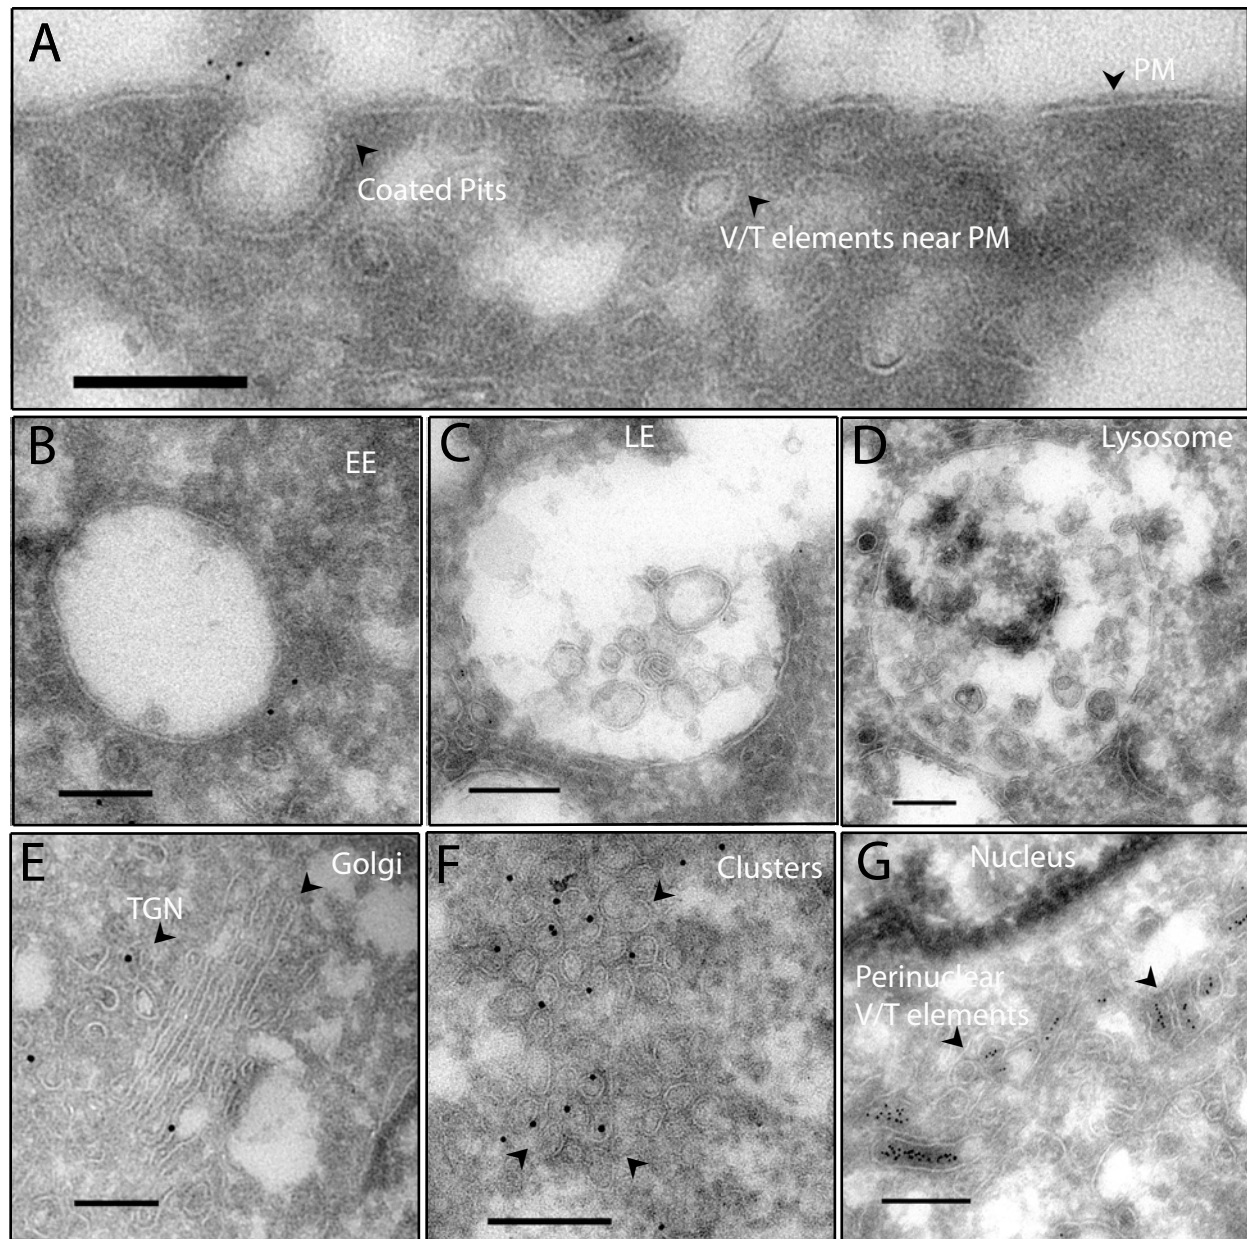

**Fig. S2. Compartments labelled with gold particles during internalisation of HA-antibodies by HA-tagged GLUT4.**

Representative transmission electron microscopy images of intracellular compartments in 3T3-L1 adipocytes. The following compartments were identified based on organelle morphology: plasma membrane, coated pits/vesicles at and vesicles/tubules near to the plasma membrane (A), early endosomes (B), late endosomes (C), lysosomes (D), Golgi and TGN (E), clusters of vesicles (F), and V/T elements in the perinuclear region (G). Scale bars = 200 nm.

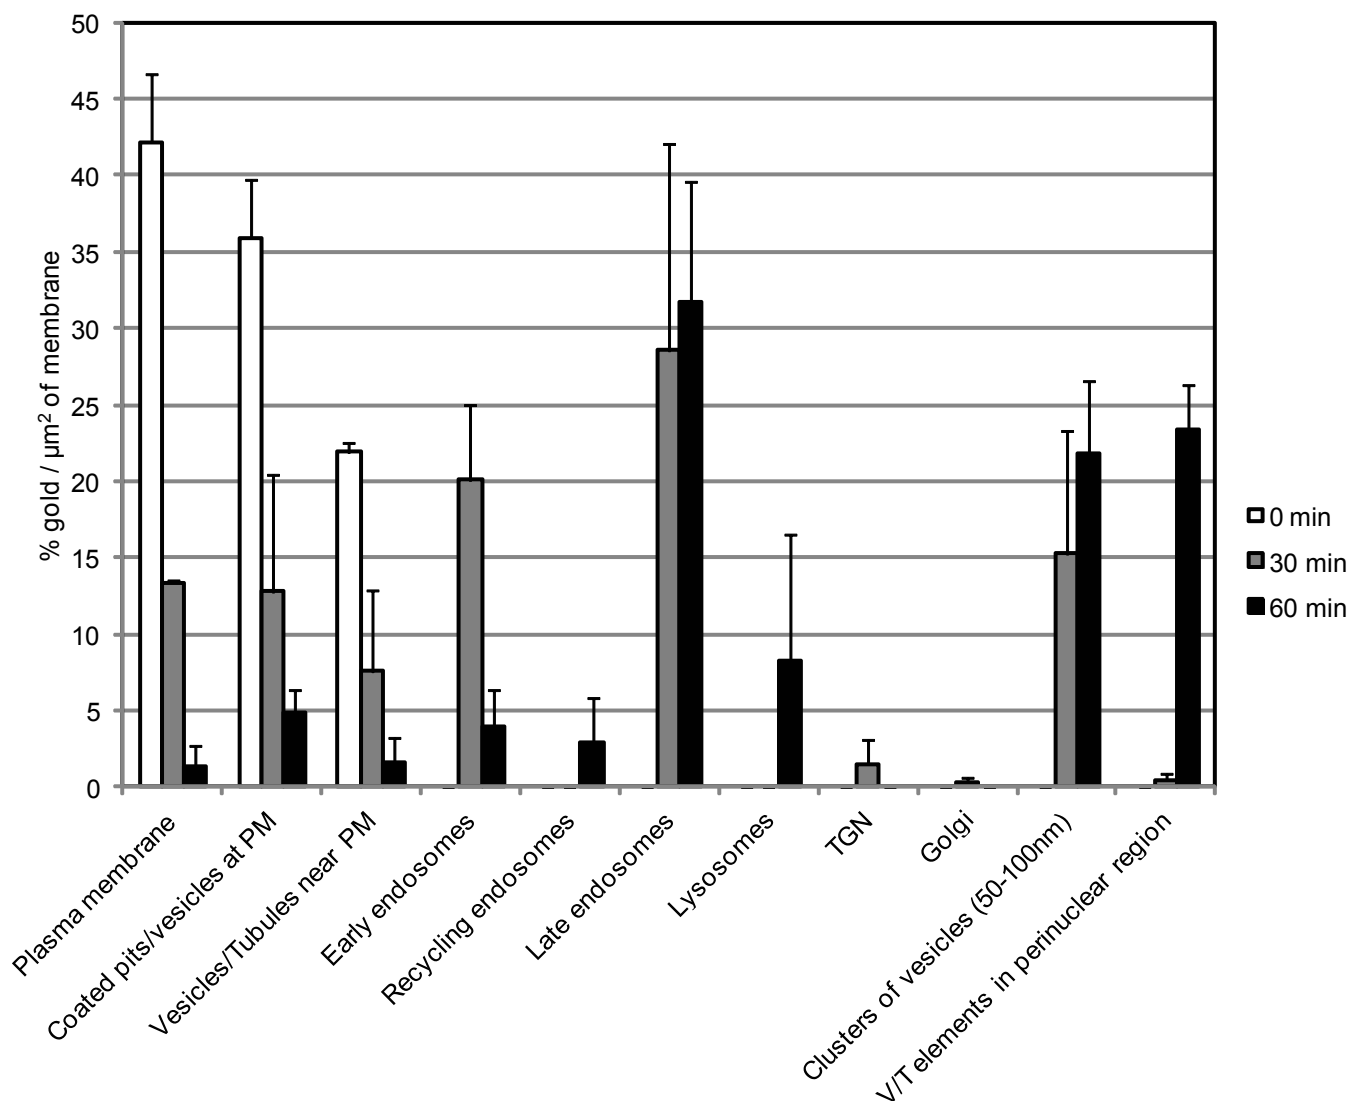

**Fig. S3. The internalisation of GLUT4 from the plasma membrane to perinuclear compartments can be followed using electron microscopy.** Scrambled 3T3-L1 adipocytes expressing HA-GLUT4-GFP were serum starved for 3 hours and stimulated for 20 minutes with 87 nM insulin. Cells were incubated with anti-HA antibody, rabbit anti-mouse bridging antibody and 5 nm Protein A gold for 20 minutes at 15°C. Cells were subsequently warmed to 37°C for the indicated times, before fixation, processing for transmission electron microscopy and quantification, as described in Materials and Methods. The graph represents the amount of gold in each compartment as a percentage of total gold. Data are from a single experiment with 3 cells analysed per time point.

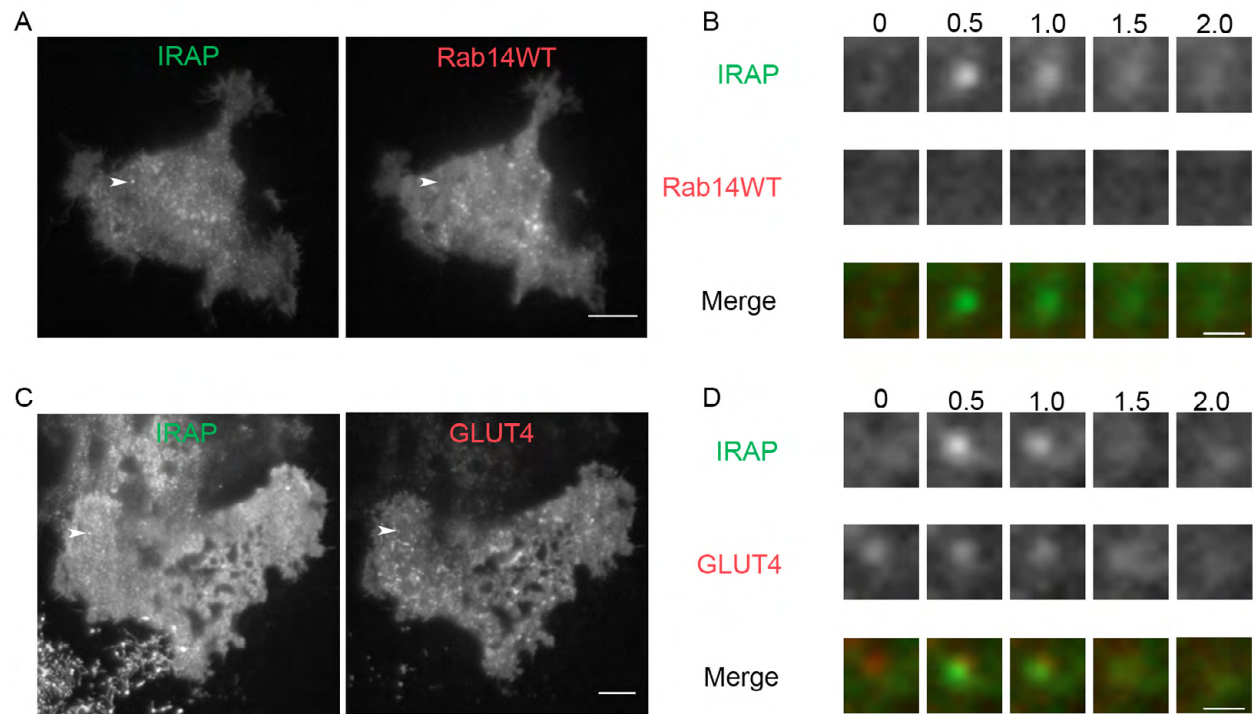

**Fig. S4. The majority of IRAP-pHluorin vesicles fusing with the plasma membrane are devoid of Rab14WT.** (A,B) 3T3-L1 adipocytes were electroporated with plasmids encoding mCherry-Rab14WT and IRAP-pHluorin. 24 hours later, cells were serum starved for 3 hours, and imaged by total internal reflection fluorescence (TIRF) microscopy using a penetration depth of 90 nm. Insulin was added at a concentration of 87 nM on the microscope. The entire cell is shown (A) in addition to an individual vesicle (B). Scale bar in A = 10  $\mu$ m. Scale bar in B = 1  $\mu$ m. (C,D) 3T3-L1 adipocytes were electroporated with plasmids encoding HA-GLUT4-mCherry and IRAP-pHluorin. 24 hours later, cells were serum starved for 3 hours, and imaged by TIRF microscopy using a penetration depth of 90 nm. Insulin was added at a concentration of 87 nM on the microscope. The entire cell is shown (C) in addition to an individual vesicle (D). Scale bar in C = 10  $\mu$ m. Scale bar in D = 1  $\mu$ m.

**Table S1. Rab4 and Rab14 give rise to a similar degree of vesicle enlargement.** 3T3-L1 adipocytes were electroporated with plasmids encoding either GFP-Rab4WT or GFP-Rab14WT. 24 hours later, cells were serum starved for 3 hours, fixed and imaged by confocal microscopy. Shown are the mean number of enlarged Rab positive vesicles per cell  $\pm$  s.e.m., and the mean diameter of enlarged Rab positive vesicles  $\pm$  s.e.m. Data are from 15 cells from 1 experiment.

|                                                     | Rab4WT          | Rab14WT         |
|-----------------------------------------------------|-----------------|-----------------|
| Mean number of Rab + enlarged vesicles/cell         | 2.93 $\pm$ 0.60 | 3.00 $\pm$ 0.87 |
| Mean diameter of Rab + enlarged vesicles ( $\mu$ m) | 1.15 $\pm$ 0.06 | 1.02 $\pm$ 0.04 |
| Number of vesicles analysed                         | 44              | 45              |
